# Supplementary material for: Topological signatures in regulatory network enable phenotypic heterogeneity in small cell lung cancer
Source: eLife. 2021 Mar 17;10:e64522. doi: 10.7554/eLife.64522 (PMC8012062; doi:10.7554/eLife.64522)
Supplement: Supplementary file 1. — (a) Frequency distribution for asynchronous Boolean update of WT SCLC network using Ising update with 220 and 225 initial conditions over three replicates. (b) Steady-state frequency distribution for top 20 states of binarized RACIPE simulation of the network. (c) Node summary of single-edge perturbation of wild-type SCLC network. [file elife-64522-supp1.xlsx]

## Sheet: a
		2^20 Initial Conditions (n=3)		2^25 Initial Conditions (n=3)
States	Frustration	Frequency (%)	Std Deviation	Frequency (%)	Std Deviation
State1	0.142	25.52	0.032	25.55	0.002
State2	0.142	25.563	0.04	25.547	0.002
State3	0.145	24.395	0.012	24.389	0.007
State4	0.145	24.395	0.018	24.386	0.003
State5	0.375	0.042	0.001	0.042	0
State6	0.375	0.041	0.001	0.043	0
State7	0.383	0.01	0	0.01	0
State8	0.383	0.011	0	0.01	0
State9	0.386	0.009	0	0.009	0
State10	0.386	0.009	0.001	0.009	0

## Sheet: b
	State 1	State 2	State 3	State 4	State 5	State 6	State 7	State 8	State 9	State 10	State 11	State 12	State 13	State 14	State 15	State 16	State 17	State 18	State 19	State 20
ASCL1	1	-1	-1	-1	1	1	1	-1	-1	-1	1	1	-1	-1	1	1	-1	1	-1	-1
ATF2	1	-1	-1	-1	1		1	-1	-1	-1	1	1	-1	-1	1	1	-1	1	-1	-1
BHLHE40	-1	1	1	1	-1	-1	-1	1	1	1	-1	-1	1	1	-1	-1	1	-1	1	1
CBFA2T2	1	-1	-1	-1	1	1	1	-1	-1	-1	1	1	-1	-1	1	1	-1	1	-1	-1
CEBPD	1	-1	-1	1	-1	1	1	1	-1	-1	-1	1	1	1	1	-1	-1	-1	1	-1
ELF3	1	-1	-1	-1	1	1	1	-1	-1	-1	1	1	-1	-1	1	1	-1	1	-1	-1
ETS2	1	-1	-1	-1	1	1	1	-1	-1	-1	1	1	-1	-1	1	1	-1	1	-1	-1
FLI1	1	-1	-1	-1	1	1	1	-1	-1	-1	1	1	-1	-1	1	1	-1	1	-1	-1
FOXA1	1	-1	-1	-1	1	1	1	-1	-1	-1	1	1	-1	-1	1	1	-1	1	-1	-1
FOXA2	1	-1	-1	-1	1	1	1	-1	-1	-1	1	1	-1	-1	1	1	-1	1	-1	-1
INSM1	1	-1	-1	-1	1	1	1	-1	-1	-1	1	1	-1	-1	1	1	-1	1	-1	-1
KDM5B	1	-1	-1	-1	1	1	1	-1	-1	-1	1	1	-1	-1	1	1	-1	1	-1	-1
KLF4	-1	1	1	1	-1	-1	-1	1	1	1	-1	1	1	1	-1	-1	1	-1	1	1
LEF1	1	-1	-1	-1	1	1	1	-1	-1	-1	1	1	-1	-1	1	1	-1	1	-1	-1
MITF	-1	1	1	1	-1	-1	-1	1	1	1	-1	-1	1	1	-1	-1	1	-1	1	1
MYB	1	-1	-1	-1	1	1	1	-1	-1	-1	1	1	-1	-1	1	1	-1	1	-1	-1
MYC	-1	1	1	1	-1	-1	-1	1	1	1	-1	-1	1	1	-1	-1	1	-1	1	1
NEUROD1	-1	-1	-1	-1	-1	1	-1	-1	1	1	1	-1	1	1	1	-1	-1	1	-1	-1
NFKB1	-1	1	1	1	-1	-1	-1	1	1	1	-1	-1	1	1	-1	-1	1	-1	1	1
OVOL2	1	-1	-1	-1	1	1	1	-1	-1	-1	1	1	-1	-1	1	1	-1	1	-1	-1
PAX5	1	-1	-1	-1	1	1	1	-1	-1	-1	1	1	-1	-1	1	1	-1	1	-1	-1
PBX1	1	-1	-1	-1	1	1	1	-1	-1	-1	1	1	-1	-1	1	1	-1	1	-1	-1
POU3F2	1	-1	-1	-1	1	1	1	-1	-1	-1	1	1	-1	-1	1	1	-1	1	-1	-1
REST	-1	1	1	1	-1	-1	-1	1	1	1	-1	-1	1	1	-1	-1	1	-1	1	1
SMAD3	-1	1	1	1	-1	-1	-1	1	1	1	-1	-1	1	1	-1	-1	1	-1	1	1
SOX11	1	-1	-1	-1	1	1	1	-1	-1	-1	1	1	-1	-1	1	1	-1	1	-1	-1
SOX2	1	-1	-1	-1	1	1	1	-1	-1	-1	1	1	-1	-1	1	1	1	1	1	1
TCF12	1	-1	-1	-1	1	1	1	-1	-1	-1	1	1	-1	-1	1	1	-1	1	-1	-1
TCF3	1	-1	-1	-1	1	1	1	-1	-1	-1	1	1	-1	-1	1	1	-1	1	-1	-1
TCF4	1	-1	-1	-1	1	1	1	-1	-1	-1	1	1	-1	-1	1	1	-1	1	-1	-1
TCF7L2	-1	1	1	1	-1	-1	-1	1	1	1	-1	-1	1	1	-1	-1	1	-1	1	1
TEAD4	-1	1	1	1	-1	-1	-1	1	1	1	-1	-1	1	1	-1	-1	1	-1	1	1
ZEB1	-1	1	-1	1	-1	-1	1	-1	1	-1	-1	-1	1	-1	1	1	1	1	1	-1
																					Total
Frequency (%)	9.47036	6.73908	4.71932	4.37659	3.34968	3.0605	2.95876	2.94681	2.45231	2.38421	2.22292	1.72488	1.40671	1.32957	1.1826	1.11992	0.999353	0.925866	0.746995	0.571183	54.6876
Closest Boolean state	X2	X1	X1	X1	X2	X3	X2	X1	X4	X4	X3	X2	X4	X4	X3	X2	X1	X3	X1	X1
Distance (genes)	0	0	1	1	1	0	1	2	0	1	1	1	1	2	1	2	1	2	2	2

## Sheet: c
Nodes	incoming edges	in_jsd_change<0.05	ptbd,in_change	in_delete_jsd<0.05	ptbd,in_delete	outgoing edges	out_change_jsd<0.05	ptbd,out_change	out_delete_jsd<0.05	ptbd,out_delete
ASCL1	8	8	0	8	0	3	2	1	2	1
ATF2	12	12	0	12	0	11	11	0	11	0
BHLHE40	12	12	0	12	0	10	10	0	10	0
CBFA2T2	10	10	0	10	0	2	2	0	2	0
CEBPD	3	1	2	1	2	9	9	0	9	0
ELF3	13	13	0	13	0	2	2	0	2	0
ETS2	15	15	0	15	0	5	4	1	4	1
FLI1	10	10	0	10	0	8	8	0	8	0
FOXA1	14	14	0	14	0	10	9	1	9	1
FOXA2	8	8	0	8	0	14	14	0	14	0
INSM1	10	10	0	10	0	1	0	1	0	1
KDM5B	11	11	0	11	0	16	16	0	16	0
KLF4	11	11	0	11	0	18	17	1	17	1
LEF1	11	11	0	11	0	16	15	1	15	1
MITF	11	11	0	11	0	14	14	0	14	0
MYB	11	11	0	11	0	10	10	0	10	0
MYC	16	16	0	16	0	27	26	1	26	1
NEUROD1	12	0	12	0	12	1	1	0	1	0
NFKB1	16	16	0	16	0	14	14	0	14	0
OVOL2	12	12	0	12	0	3	2	1	2	1
PAX5	9	9	0	9	0	5	5	0	5	0
PBX1	8	8	0	8	0	5	5	0	5	0
POU3F2	9	9	0	9	0	7	6	1	6	1
REST	10	10	0	10	0	21	19	2	19	2
SMAD3	12	12	0	12	0	12	12	0	12	0
SOX11	7	7	0	7	0	4	3	1	3	1
SOX2	9	9	0	9	0	23	21	2	21	2
TCF12	12	12	0	12	0	10	9	1	9	1
TCF3	12	12	0	12	0	16	15	1	15	1
TCF4	12	12	0	12	0	20	19	1	19	1
TCF7L2	15	15	0	15	0	19	19	0	19	0
TEAD4	9	9	0	9	0	20	19	1	19	1
ZEB1	7	3	4	3	4	1	1	0	1	0
