# Supplementary material for: Topological signatures in regulatory network enable phenotypic heterogeneity in small cell lung cancer
Source: eLife. 2021 Mar 17;10:e64522. doi: 10.7554/eLife.64522 (PMC8012062; doi:10.7554/eLife.64522)
Supplement: Supplementary file 2. — (a) Cell line classification of CCLE dataset using different cluster values for k-means and hierarchical algorithm over four genes of interest (ASCL1, NEUROD1, YAP1, and POU2F3). Also contains the classification as given by Wooten et al., 2019. (b) Cell line classification of GSE73160 dataset using different cluster values for k-means and hierarchical algorithm over four genes of interest (ASCL1, NEUROD1, YAP1, and POU2F3). Also contains the classification as given by Wooten et al., 2019 (for the cell lines included in both GSE73160 and CCLE). [file elife-64522-supp2.xlsx]

## Sheet: a
Cell Lines	Hierarchical(4)	Hierarchical(5)	K-means(4)	K-means(5)	Wooten's Classification
NCIH1184	A+	A+ N+	A+	A+N+	A+
NCIH209	A+	A+ N+	A+	A+N+	A+
NCIH2066	A+	A+ N+	A+	A+N+	Non-NE
CORL88	A+	A+ N+	A+	A+N+	A+N+
COLO668	A+	A+ N+	A+	A+N+	A+N+
DMS53	A+	A+ N+	A+	A+N+	A+N+
NCIH1876	A+	A+ N+	A+	A+N+	A+
NCIH1092	A+	A+ N+	A+	A+N+	A+
NCIH1836	A+	A+ N+	A+	A+N+	A+
NCIH2081	A+	A+ N+	A+	A+N+	A+
NCIH69	A+	A+ N+	A+	A+N+	A+
DMS153	A+	A+ N+	A+	A+N+	A+N+
DMS79	A+	A+ N+	A+	A+N+	A+
DMS454	A+	A+ N+	A+	A+N+	A+N+
NCIH1048	P+	P+	P+	P+	Non-NE
NCIH211	P+	P+	P+	P+	Non-NE
CORL311	P+	P+	P+	P+	N+
NCIH526	P+	P+	P+	P+	N+
DMS273	N+	N+	N+	N+	N+
CORL24	N+	N+	N+	N+	N+
HCC33	N+	N+	N+	N+	N+
SCLC21H	N+	N+	N+	N+	N+
CPCN	N+	N+	N+	N+	N+
NCIH524	N+	N+	N+	N+	N+
CORL279	N+	N+	N+	A+N+	A+
NCIH2227	N+	N+	N+	N+	N+
NCIH2171	N+	N+	N+	N+	N+
NCIH1694	N+	N+	N+	N+	N+
NCIH82	N+	N+	N+	N+	N+
NCIH446	N+	N+	N+	N+	N+
SBC5	Y+	Y+	Y+	Y+	Non-NE
NCIH196	Y+	Y+	Y+	Y+	Non-NE
NCIH1339	Y+	Y+	Y+	Y+	Non-NE
NCIH2286	Y+	Y+	Y+	Y+	Non-NE
SW1271	Y+	Y+	Y+	Y+	Non-NE
NCIH1341	Y+	Y+	Y+	Y+	Non-NE
NCIH841	Y+	Y+	Y+	Y+	Non-NE
DMS114	Y+	Y+	Y+	Y+	Non-NE
CORL47	A+	A+	A+	A+	A+
NCIH2029	A+	A+	A+	A+	A+N+
SHP77	A+	A+	A+	A+	A+N+
NCIH2196	A+	A+	A+	A+	A+N+
NCIH1963	A+	A+	A+	A+	A+
NCIH1105	A+	A+	A+	A+	A+
NCIH1436	A+	A+	A+	A+	A+
NCIH1930	A+	A+	A+	A+	A+
NCIH889	A+	A+	A+	A+	A+
NCIH1618	A+	A+	A+	A+	A+
CORL95	A+	A+	A+	A+	A+N+
NCIH510	A+	A+	A+	A+	A+N+
NCIH2141	A+	A+	A+	A+	A+
NCIH146	A+	A+	A+	A+	A+

## Sheet: b
Cell Lines	Hierarchal (4)	Hierarchal (5)	K-means (4)	K-means (5)	Wooten's Classification (if present)
NCIH211	P+	P+	P+	P+	Non-NE
NCIH526	P+	P+	P+	P+	N+
NCIH1048	P+	P+	P+	P+	Non-NE
NCIH196	Y+	Y+	Y+	Y+	Non-NE
NCIH841	Y+	Y+	Y+	Y+	Non-NE
DMS 273	Y+	Y+	Y+	Y+	N+
NCIH1341	Y+	Y+	Y+	Y+	Non-NE
DMS 114	Y+	Y+	Y+	Y+	Non-NE
NCIH209	N+	A+N+	N+	A+N+	A+
NCIH1672	N+	A+N+	A+	A+N+
NCIH2330	N+	A+N+	N+	A+N+
NCIH2081	A+	A+	A+	A+N+	A+
DMS 187	N+	A+N+	N+	A+N+
NCIH720	A+	A+	A+	A+N+
DMS 53	N+	A+N+	A+	A+N+	A+N+
NCIH1417	A+	A+	A+	A+N+
NCIH1092	A+	A+	A+	A+N+	A+
NCIH378	N+	A+N+	N+	A+N+
SW 1271	N+	A+N+	N+	A+N+	Non-NE
NCIH1836	A+	A+	A+	A+	A+
NCIH1436	A+	A+	A+	A+	A+
NCIH1876	A+	A+	A+	A+	A+
NCIH1618	A+	A+	A+	A+	A+
NCIH146	A+	A+	A+	A+	A+
NCIH1882	A+	A+	A+	A+
NCIH2141	A+	A+	A+	A+	A+
NCIH69	A+	A+	A+	A+	A+
COLO 668	A+	A+	A+	A+	A+ N+
CORL32	A+	A+	A+	A+
CORL47	A+	A+	A+	A+	A+
DMS 79	A+	A+	A+	A+	A+
NCIH2029	A+	A+	A+	A+	A+N+
NCIH2198	A+	A+	A+	A+
NCIH735	A+	A+	A+	A+
NCIH711	A+	A+	A+	A+
NCIH774	A+	A+	A+	A+
COR L88	A+	A+	A+	A+	A+N+
NCIH187	A+	A+	A+	A+
NCIH865	A+	A+	A+	A+
NCIH889	A+	A+	A+	A+	A+
NCIH1688	A+	A+	A+	A+
NCIH1963	A+	A+	A+	A+	A+
NCIH1930	A+	A+	A+	A+	A+
NCIH249	A+	A+	A+	A+
NCIH250	A+	A+	A+	A+
NCIH510	A+	A+	A+	A+	A+N+
NCIH345	A+	A+	A+	A+
NCIH1522	A+	A+	A+	A+
LXFS 605L	A+	A+	A+	A+
NCIH748	A+	A+	A+	A+
NCIH719	A+	A+	A+	A+
NCIH660	A+	A+	A+	A+
NCIH128	A+	A+	A+	A+
NCIH1105	A+	A+	A+	A+	A+
SHP77	A+	A+	A+	A+	A+N+
NCIH2107	A+	A+	A+	A+
NCIH2171	N+	N+	N+	N+	N+
NCIH220	N+	N+	N+	N+
NCIH1694	N+	N+	N+	N+	N+
LXFS 650L	N+	N+	N+	N+
NCIH82	N+	N+	N+	N+	N+
NCIH524	N+	N+	N+	N+	N+
NCIH446	N+	N+	N+	N+	N+
NCIH847	N+	N+	N+	N+
