# Supplementary material for: Topological signatures in regulatory network enable phenotypic heterogeneity in small cell lung cancer
Source: eLife. 2021 Mar 17;10:e64522. doi: 10.7554/eLife.64522 (PMC8012062; doi:10.7554/eLife.64522)
Supplement: Supplementary file 3. — (a) Steady-state frequency distribution for asynchronous Boolean update of network for genes corresponding to GROUP A and ELF3. (b) Steady-state frequency distribution for asynchronous Boolean update of network for genes corresponding to GROUP A only. (c) Steady-state frequency distribution for asynchronous Boolean update of network for genes corresponding to GROUP B only. (b) Steady-state frequency distribution for asynchronous Boolean update of network for genes corresponding to GROUP A only. Steady-state frequency distribution for asynchronous Boolean update of network for genes corresponding to GROUP B only. Steady-state frequency distribution for asynchronous Boolean update of network for genes corresponding to GROUP B and ELF3. [file elife-64522-supp3.xlsx]

## Sheet: a
	Steady State	Steady State	Steady State	Steady State	Steady State	Steady State	Steady State	Steady State
ASCL1	1	-1	1	-1	-1	-1	1	1
ATF2	1	-1	1	-1	1	1	-1	-1
CBFA2T2	1	-1	1	-1	1	1	-1	-1
CEBPD	1	-1	1	-1	-1	-1	1	1
ELF3	-1	1	1	-1	1	-1	-1	1
ETS2	1	-1	1	-1	-1	-1	1	1
FLI1	1	-1	1	-1	-1	-1	1	1
FOXA1	1	-1	1	-1	1	1	-1	-1
FOXA2	1	-1	1	-1	1	1	-1	-1
INSM1	1	-1	1	-1	-1	-1	1	1
KDM5B	1	-1	1	-1	1	1	-1	-1
LEF1	1	-1	1	-1	-1	-1	1	1
MYB	1	-1	1	-1	1	1	-1	-1
OVOL2	1	-1	1	-1	1	1	-1	-1
PAX5	1	-1	1	-1	-1	-1	1	1
PBX1	1	-1	1	-1	1	1	-1	-1
POU3F2	1	-1	1	-1	-1	-1	1	1
SOX11	1	-1	1	-1	-1	-1	1	1
SOX2	1	-1	1	-1	-1	-1	1	1
TCF12	1	-1	1	-1	1	1	-1	-1
TCF3	1	-1	1	-1	-1	-1	1	1
TCF4	1	-1	1	-1	-1	-1	1	1
Frequency	0.224003	0.224205	0.269182	0.26922	0.00371742	0.00278187	0.003932	0.0029583
Frustration	0.097561	0.097561	0.0894309	0.0894309	0.349593	0.357724	0.349593	0.357724

## Sheet: b
	Steady State	Steady State	Steady State	Steady State
ASCL1	-1	1	1	-1
ATF2	-1	1	-1	1
CBFA2T2	-1	1	-1	1
CEBPD	-1	1	1	-1
ETS2	-1	1	1	-1
FOXA1	-1	1	-1	1
FOXA2	-1	1	-1	1
FLI1	-1	1	1	-1
INSM1	-1	1	1	-1
KDM5B	-1	1	-1	1
LEF1	-1	1	1	-1
MYB	-1	1	-1	1
OVOL2	-1	1	-1	1
PAX5	-1	1	1	-1
PBX1	-1	1	-1	1
POU3F2	-1	1	1	-1
SOX11	-1	1	1	-1
SOX2	-1	1	1	-1
TCF12	-1	1	-1	1
TCF3	-1	1	1	-1
TCF4	-1	1	1	-1
Frequency	0.492774	0.4938	0.00667	0.00675583
Frustration	0.0689655	0.0689655	0.344828	0.344828

## Sheet: c
	Steady State	Steady State	Steady State	Steady State	Steady State	Steady State
BHLHE40	1	-1	-1	1	-1	1
KLF4	1	-1	1	-1	-1	1
MITF	1	-1	1	-1	1	-1
MYC	1	-1	-1	1	1	-1
NFKB1	1	-1	-1	1	-1	1
REST	1	-1	-1	1	-1	1
SMAD3	1	-1	1	-1	-1	1
TCF7L2	1	-1	-1	1	1	-1
TEAD4	1	-1	-1	1	1	-1
ZEB1	1	-1	-1	1	-1	1
Frequency	0.455468	0.454991	0.0393229	0.0389013	0.00566006	0.00565624
Frustration	0.0784314	0.0784314	0.333333	0.333333	0.431373	0.431373

## Sheet: d
	Steady State	Steady State	Steady State	Steady State	Steady State	Steady State
BHLHE40	-1	1	1	-1	-1	1
ELF3	1	-1	-1	1	-1	1
KLF4	-1	1	-1	1	-1	1
MITF	-1	1	-1	1	1	-1
MYC	-1	1	1	-1	1	-1
NFKB1	-1	1	1	-1	-1	1
REST	-1	1	1	-1	-1	1
SMAD3	-1	1	-1	1	-1	1
TCF7L2	-1	1	1	-1	1	-1
TEAD4	-1	1	1	-1	1	-1
ZEB1	-1	1	1	-1	-1	1
Frequency	0.4538	0.4548	0.0403	0.0403	0.0053	0.0054
Frustration	0.085	0.085	0.305	0.305	0.407	0.407
